1                   **Membrane voltage-dependent activation of**  
2                   **the flagellar protein export engine**

3  
4                   **Tohru Minamino<sup>1,\*</sup>, Yusuke V. Morimoto<sup>2</sup>**

5                   **Miki Kinoshita<sup>1</sup> and Keiichi Namba<sup>1,3,4,\*</sup>**

6  
7                   <sup>1</sup>Graduate School of Frontier Biosciences, Osaka University, 1-3 Yamadaoka, Suita,  
8                   Osaka 565-0871, Japan

9                   <sup>2</sup>Department of Physics and Information Technology, Faculty of Computer Science and  
10                  Systems Engineering, Kyushu Institute of Technology, 680-4 Kawazu, Iizuka, Fukuoka  
11                  820-8502, Japan

12                  <sup>3</sup>RIKEN Spring-8 Center and Center for Biosystems Dynamics Research, 1-3  
13                  Yamadaoka, Suita, Osaka 565-0871, Japan

14                  <sup>4</sup>JEOL YOKOGUSHI Research Alliance Laboratories, Osaka University, 1-3  
15                  Yamadaoka, Suita, Osaka 565-0871, Japan

16  
17                  \*Address correspondence to T. Minamino, [tohru@fbs.osaka-u.ac.jp](mailto:tohru@fbs.osaka-u.ac.jp) and K. Namba,  
18                  [keiichi@fbs.osaka-u.ac.jp](mailto:keiichi@fbs.osaka-u.ac.jp).

1 **Abstract**

2 **Ion motive force (IMF) consists of the electric potential difference ( $\Delta\psi$ ) and the**  
3 **ion concentration difference ( $\Delta p_i$ ) across the cytoplasmic membrane. The**  
4 **flagellar protein export machinery is an ion/protein antiporter utilizing IMF to**  
5 **drive ion-coupled protein export, but it remains unknown how. Here, we report**  
6 **a  $\Delta\psi$ -dependent activation mechanism of the transmembrane export gate**  
7 **complex. Depletions of both  $H^+$  and  $Na^+$  gradients nearly diminished flagellar**  
8 **protein export in the absence of the cytoplasmic ATPase complex, but an**  
9 **increase in  $\Delta\psi$  by an upward shift of external pH from 7.5 to 8.5 dramatically**  
10 **recovered it. An increase in the cytoplasmic level of export substrates and gain-**  
11 **of-function mutations in FlhA enhanced protein export at external pH 7.5 in the**  
12 **absence of  $Na^+$  in a similar manner to  $\Delta\psi$  increase. We propose that the export**  
13 **gate complex has a voltage-gated mechanism to activate the ion/protein**  
14 **antiporter of the flagellar protein export engine.**

15

1 Ion motive force (IMF) across the biological membrane is one of the most important  
2 biological energies. IMF is composed of the electric potential difference ( $\Delta\psi$ ) and  
3 chemical potential difference of ions ( $\Delta\mu$ ) across the membrane. IMF is utilized for  
4 many of the essential biological activities, such as ATP synthesis, solute transport,  
5 nutrient uptake, protein secretion, flagella-driven motility and so on<sup>1</sup>. Although  $\Delta\psi$  and  
6  $\Delta\mu$  are equivalent driving forces for the translocation of ions across the cytoplasmic  
7 membrane, it has been reported that  $\Delta\psi$  facilitates the translocation of negatively  
8 charged residues of secreted proteins across the membrane by an electrophoretic  
9 mechanism<sup>2,3</sup>. Thus,  $\Delta\psi$  plays a distinct role in protein secretion.

10 The bacterial flagellum is a supramolecular protein complex consisting of the  
11 basal body acting as an ion-driven rotary motor, the hook as a universal joint and the  
12 filament as a helical propeller. The flagellar motor converts the ion influx through a  
13 transmembrane ion channel of the stator unit into the force for high-speed rotation of  
14 the long helical filament<sup>4,5</sup>. It has been reported that  $\Delta\psi$  and  $\Delta\mu$  are also not equivalent  
15 as the driving force for high-speed motor rotation at low load<sup>6</sup>.

16 For construction of the hook and filament structures in the cell exterior, flagellar  
17 building blocks are transported via a specialized protein export apparatus to the distal  
18 end of the growing flagellar structure. The flagellar protein export machinery of  
19 *Salmonella enterica* serovar Typhimurium (hereafter referred to *Salmonella*) is  
20 composed of a transmembrane export gate complex made of FlhA, FlhB, FliP, FliQ  
21 and FliR and a cytoplasmic ATPase ring complex consisting of FliH, FliI and FliJ (Fig.  
22 1)<sup>7,8</sup>. These proteins are evolutionally related to those of virulence-associated type III  
23 secretion systems of pathogenic bacteria, which inject effector proteins into eukaryotic  
24 host cells for invasion<sup>9</sup>. Furthermore, the entire structure of the cytoplasmic ATPase

1 ring complex is structurally similar to a cytoplasmic F<sub>1</sub> part of F<sub>0</sub>F<sub>1</sub>-ATP synthase, which  
2 utilizes PMF for ATP synthesis<sup>10,11</sup>.

3 The flagellar protein export machinery utilizes ATP and PMF to drive flagellar  
4 protein export<sup>12,13</sup>. The transmembrane export gate complex couples an inward-  
5 directed proton (H<sup>+</sup>) flow with an outward-directed protein export<sup>14,15</sup>. ATP hydrolysis  
6 by the Flil ATPase activates the export gate complex to become an active export  
7 engine that uses PMF to drive H<sup>+</sup>-coupled protein export<sup>16</sup>. This export engine can also  
8 use sodium (Na<sup>+</sup>) motive force (SMF) to drive Na<sup>+</sup>-coupled flagellar protein export over  
9 a wide range of external pH when the cytoplasmic ATPase complex does not function  
10 properly<sup>17</sup>. It has been shown that FlhA forms a pathway for the transit of both H<sup>+</sup> and  
11 Na<sup>+</sup> across the cytoplasmic membrane<sup>17</sup>, suggesting that FlhA acts as an energy  
12 supplier for the export gate complex.

13 Only the  $\Delta\psi$  component of PMF is sufficient for flagellar protein export by  
14 *Salmonella* wild-type cells<sup>13,14</sup>. However, a chemical potential gradient of either H<sup>+</sup>  
15 ( $\Delta\text{pH}$ ) or Na<sup>+</sup> ( $\Delta\text{pNa}$ ) becomes essential in the absence of the cytoplasmic ATPase  
16 complex, suggesting that  $\Delta\psi$  and  $\Delta\text{pH}/\Delta\text{pNa}$  are used for different steps of the flagellar  
17 protein export process<sup>14,17</sup>. To clarify how the export gate complex uses these two  
18 distinct energies, we used a *Salmonella*  $\Delta\text{fliH-flil flhB}(P28T)$  mutant, of which flagellar  
19 protein export engine requires both  $\Delta\psi$  and  $\Delta\text{pH}/\Delta\text{pNa}$  to exert its protein transport  
20 activity<sup>14,17</sup>. We show that an increase in  $\Delta\psi$  by an upward shift of external pH from 7.5  
21 to 8.5 activates flagellar protein export by this mutant in the absence of  $\Delta\text{pH}$  and  $\Delta\text{pNa}$ ,  
22 suggesting the presence of a  $\Delta\psi$ -dependent activation mechanism of the export gate  
23 complex to transport flagellar building blocks to form flagella on the cell surface.

24

## 25 Results

1 **Effect of increase in  $\Delta\psi$  on flagellar protein export.** The  $\Delta\text{pH}$  and  $\Delta\text{pNa}$  components  
2 are thought to be required for efficient transit of  $\text{H}^+$  and  $\text{Na}^+$  through the FlhA ion  
3 channel, respectively, besides  $\Delta\psi$  when FliH and FliI are missing<sup>14,17</sup>. In *Salmonella*,  
4 intracellular pH is maintained at about 7.5 over a wide range of external pH<sup>18</sup>. Higher  
5 external pH than 7.5 results in a negative  $\Delta\text{pH}$  but total PMF is maintained by an  
6 increase in  $\Delta\psi$  in bacterial cells<sup>19,20</sup>. Consistently, our measurements showed that  $\Delta\psi$   
7 was larger at external pH 8.5 than that at external pH 7.5 (Fig. 2a and Supplementary  
8 Table 1) and that there was no significant difference in total PMF (Fig. 2b and  
9 Supplementary Table 1). To clarify the role of  $\Delta\psi$  in flagellar protein export, we used a  
10 *Salmonella*  $\Delta\text{fliH-fliI flhB}(P28T)$  strain, of which *flhB}(P28T)* mutation considerably  
11 increases the protein transport activity of the transmembrane export gate complex in  
12 the absence of FliH and FliI<sup>12</sup>. The  $\Delta\text{fliH-fliI flhB}(P28T)$  mutant cells were exponentially  
13 grown in T-broth at external pH 7.5 (TB-7.5) or 8.5 (TB-8.5) in the absence of NaCl,  
14 and then the levels of the hook-capping protein FlgD secreted by this mutant were  
15 analyzed by immunoblotting with polyclonal anti-FlgD antibody (Fig. 3a) as a  
16 representative assay of flagellar protein export activity. In the  $\Delta\text{fliH-fliI flhB}(P28T) \Delta\text{flhA}$   
17 strain, which is a negative control, no FlgD was detected in the culture supernatant.  
18 The  $\Delta\text{fliH-fliI flhB}(P28T)$  mutant cells secreted FlgD into the culture media at external  
19 pH 8.5 but not at external pH 7.5 (Fig. 3a), indicating that about 1.5-fold greater  $\Delta\psi$   
20 activates flagellar protein export in the absence of the cytoplasmic ATPase complex.  
21 When the external pH value was varied over a range of 7.0 to 8.5, the relative secretion  
22 level of FlgD by this mutant increased from almost zero at pH 7.0 and 7.5 to about 0.8  
23 at external pH 8.0 and finally to 1.0 at external pH 8.5 (Fig. 3b). Because there was no  
24 difference in total PMF between external pH values of 7.5 and 8.5 (Fig. 2b), we suggest  
25 that the export gate complex can become an active ion/protein antiporter to drive

1 flagellar protein export in a  $\Delta\psi$ -dependent manner when  $\Delta\psi$  is increased to a level  
2 above a certain threshold.

3 To count the population of flagellated cells and measure their flagellar length in  
4 the  $\Delta fliH-fliI flhB(P28T)$  mutant exponentially grown in TB-7.5 or TB-8.5, we labelled  
5 flagellar filaments with a fluorescent dye (Fig. 4a) and measured the number and length  
6 of the filaments (Supplementary Table 2). Only 1.0% of the  $\Delta fliH-fliI flhB(P28T)$  cells  
7 had a single flagellar filament at external pH 7.5 ( $n = 198$ ) (Fig. 4b). In contrast, at  
8 external pH 8.5, 60.5% of the  $\Delta fliH-fliI flhB(P28T)$  cells produced the filaments with an  
9 average number of  $1.3 \pm 0.5$  per cell [mean  $\pm$  standard deviation (SD),  $n = 107$ ] (Fig.  
10 4b). The average filament length was  $4.8 \pm 1.5 \mu\text{m}$  ( $n = 50$ ), which was about 2-fold  
11 shorter than the wild-type length [ $9.2 \pm 2.2 \mu\text{m}$  ( $n = 50$ )] (Fig. 4c), indicating that the  
12 filament growth rate of the  $\Delta fliH-fliI flhB(P28T)$  mutant is about 2-fold slower than that  
13 of wild-type cells when flagellar construction occurs.

14 The  $\Delta\psi$  component of PMF is essential for flagellar protein export by *Salmonella*  
15 wild-type cells<sup>13,14</sup>. Therefore, we tested whether the 1.5-fold greater  $\Delta\psi$  also increases  
16 the secretion level of FlgD by wild-type cells. Total PMF did not change at all when the  
17 external pH increased from 7.5 to 8.5 in the wild-type cells as well (Fig. 2b). An upward  
18 pH shift from 7.5 to 8.5 neither affected the secretion of FlgD nor flagellar filament  
19 formation significantly (Figs. 3a, b and 4), indicating that the greater  $\Delta\psi$  does not  
20 facilitate protein export by the wild-type protein export apparatus. This suggests that  
21 the rate of  $\text{H}^+$ -coupled protein translocation by the export gate complex could be high  
22 enough to obscure the effect of greater  $\Delta\psi$  in the presence of FliH and FliI.

23

24 **Effect of gain-of-function mutations in FlhA on  $\Delta\psi$ -dependent flagellar protein**  
25 **export by the  $\Delta fliH-fliI flhB(P28T)$  strain.** The  $\Delta fliH-fliI flhB(P28T)$  cells absolutely

1 require the  $\Delta pNa$  component to drive flagellar protein export at external pH 7.5 because  
2 the  $\Delta pH$  component of PMF is gone<sup>17</sup>. It has been reported that the *flhA(D456V)*,  
3 *flhA(F459A)* and *flhA(T490A)* mutations, for which the mutated residues are located in  
4 the C-terminal cytoplasmic domain of FlhA (FlhA<sub>C</sub>) (Supplementary Fig. 1a),  
5 significantly increase the probability of docking of flagellar building blocks to the export  
6 gate complex in the absence of FliH and FliI, thereby increasing the probability of hook-  
7 basal body assembly in the  $\Delta fliH$ -*fliI flhB(P28T)* mutant<sup>21</sup>. This raises the possibility that  
8 these *flhA* mutations would reduce Na<sup>+</sup>-dependence of flagellar protein export by the  
9  $\Delta fliH$ -*fliI flhB(P28T)* mutant. To examine this possibility, we analyzed the effect of Na<sup>+</sup>  
10 depletion on FlgD secretion by the  $\Delta fliH$ -*fliI flhB(P28T) flhA(F459A)* mutant. This  
11 mutant was exponentially grown in TB-7.5 with or without 100 mM NaCl, and then FlgD  
12 secretion levels were analyzed by immunoblotting with polyclonal anti-FlgD antibody.  
13 FlgD was detected in the culture supernatant in the absence of Na<sup>+</sup>, but the secretion  
14 level of FlgD was significantly increased by adding 100 mM NaCl (Supplementary Fig.  
15 1b). We also obtained essentially the same results with alternative  $\Delta fliH$ -*fliI flhB(P28T)*  
16 *flhA(D456V)* and  $\Delta fliH$ -*fliI flhB(P28T) flhA(T490M)* mutants (Supplementary Fig. 1b).  
17 An upward pH shift from 7.5 to 8.5 to increase  $\Delta\psi$  did not increase the secretion level  
18 of FlgD by the  $\Delta fliH$ -*fliI flhB(P28T) flhA(F459A)* mutant (Fig. 3c). These results suggest  
19 that these *flhA* mutations reduce the  $\Delta\psi$ -dependency of flagellar protein export by the  
20 export gate complex in the absence of FliH and FliI.

21 We next measured the number and length of the filaments produced by the  
22  $\Delta fliH$ -*fliI flhB(P28T) flhA(F459A)* mutant grown exponentially in TB-7.5 with or without  
23 100 mM NaCl (Supplementary Fig. 2a and Supplementary Table 3). In the absence of  
24 NaCl, 21.8% of the  $\Delta fliH$ -*fliI flhB(P28T) flhA(F459A)* cells produced the filaments with  
25 an average number of  $1.1 \pm 0.3$  per cell ( $n = 121$ ) while the remaining 78.2% had no

1 filaments ([Supplementary Fig. 2b](#)). The average filament length was  $3.3 \pm 1.6 \mu\text{m}$  ( $n =$   
2 50) ([Supplementary Fig. 2c](#)). In the presence of 100 mM NaCl, about 76.3% of the  
3  $\Delta\text{fliH-fliI flhB}(P28T) flhA(F459A)$  mutant cells produced the filaments with an average  
4 number of  $1.7 \pm 0.8$  per cell ( $n = 222$ ) ([Supplementary Fig. 2b](#)), indicating that the  $\Delta\text{pNa}$   
5 component of SMF significantly increases the probability of flagellar formation. The  
6 average filament length was  $3.4 \pm 2.0 \mu\text{m}$ , which was almost the same as that in the  
7 absence of NaCl ([Supplementary Fig. 2c](#)). We also obtained the same results with the  
8  $\Delta\text{fliH-fliI flhB}(P28T) flhA(D456V)$  and  $\Delta\text{fliH-fliI flhB}(P28T) flhA(T490M)$  mutants  
9 ([Supplementary Fig. 2](#)).

10 To test whether the *flhB(P28T)* and *flhA(F459A)* mutations affect the  $\Delta\psi$ -  
11 dependency of flagellar protein export by the export gate complex in the presence of  
12 FliH and FliI, we analyzed the number and length of flagellar filaments produced by the  
13 *flhB(P28T)* and *flhA(F459A)* mutants. More than 95% of the *flhB(P28T)* and  
14 *flhA(F459A)* mutant cells produced the filaments with the number per cell at the wild-  
15 type level in the presence and absence of 100 mM NaCl ([Supplementary Fig. 2b](#)). The  
16 average filament length of the *flhB(P28T)* mutant was almost the same as that of wild-  
17 type cells, but that of the *flhA(F459A)* mutant was about half of the wild-type  
18 ([Supplementary Fig. 2c](#)) due to the reduced secretion levels of flagellin (FliC)  
19 molecules<sup>22</sup>. These observations suggest that the export gate complex does not  
20 require either greater  $\Delta\psi$  or  $\Delta\text{pNa}$  for flagellar protein export and assembly in the  
21 presence of FliH and FliI.

22 Freely diffusing FliA molecules conduct both  $\text{H}^+$  and  $\text{Na}^+$ , but their  $\text{H}^+$  channel  
23 activity is lower than the  $\text{Na}^+$  channel activity<sup>17</sup>. To test whether the gain-of-function  
24 mutations in FliA facilitate the  $\text{H}^+$  channel activity of FliA, we expressed a ratiometric  
25 pH indicator probe, pHluorin<sup>23,24</sup>, in *E. coli* BL21 (DE3) cells and measured intracellular



1 pH change upon lowering the external pH value from 7.5 to 5.5 to generate much  
2 greater  $\Delta$ pH (Supplementary Fig. 3a and Supplementary Table 4). Intracellular pH of  
3 the FlhA-expressing cells was  $7.10 \pm 0.06$  (mean  $\pm$  SD), which was ca. 0.06 pH unit  
4 lower than that of the vector control ( $7.16 \pm 0.06$ ). This small pH drop was a statistically  
5 significant value ( $P = 0.037$ ), indicating the H<sup>+</sup> channel activity. The Intracellular pH of  
6 the cells expressing FlhA with *flhA(D456V)*, *flhA(F459A)* or *flhA(T490A)* mutations  
7 were essentially the same as that of the cells expressing wild-type FlhA  
8 (Supplementary Fig. 3a), indicating that these *flhA* mutations do not show any increase  
9 in the H<sup>+</sup> channel activity of FlhA.

10

11 **Effect of FlgM deletion on flagellar protein export.** FlhA<sub>C</sub> and the C-terminal  
12 cytoplasmic domain of FlhB (FlhB<sub>C</sub>) form a docking platform for FliH, FliI, FliJ, export  
13 chaperones (FlgN, FliS, FliT) and export substrates (Fig. 1)<sup>25</sup>, and this FlhA<sub>C</sub>-FlhB<sub>C</sub>  
14 docking platform plays an important role in the coordinated flagellar protein export with  
15 assembly<sup>26</sup>. We found that the *flhA(D456V)*, *flhA(F459A)* and *flhA(T490A)* mutations  
16 in FlhA<sub>C</sub> activated the export gate complex of the  $\Delta$ *fliH-fliI flhB(P28T)* mutant to a  
17 considerable degree in the absence of greater  $\Delta\psi$  and  $\Delta$ pNa (Fig. 3c and  
18 Supplementary Fig. 1), raising a question of whether an increase in the expression  
19 levels of export substrates also reduces the  $\Delta\psi$ -dependence of flagellar protein export  
20 by the  $\Delta$ *fliH-fliI flhB(P28T)* mutant. Because depletion of FlgM, which is a negative  
21 regulator of the flagellar regulon<sup>27</sup>, considerably increases the expression levels of FliJ,  
22 flagellar export chaperones and export substrates, thereby increasing the probability  
23 of flagellar formation even in the absence of FliH and FliI<sup>28,29</sup>, we introduced the  
24  $\Delta$ *flgM::km* allele into the wild-type and  $\Delta$ *fliH-fliI flhB(P28T)* mutant strains by P22-  
25 mediated transduction to generate the  $\Delta$ *flgM* and  $\Delta$ *fliH-fliI flhB(P28T) \Delta*flgM* mutant*

1 strains (Fig. 3d, e). FlgM deletion allowed the  $\Delta fliH-fliI flhB(P28T)$  mutant to secrete FlgD  
2 into the culture media at external pH 7.5 (Fig. 3e). An upward pH shift from 7.5 to 8.5,  
3 which increases  $\Delta\psi$ , increased the secretion level of FlgD but only by about 1.5-fold.  
4 These results suggest that the FlgM deletion significantly reduces the  $\Delta\psi$ -dependency  
5 of ion-coupled protein export by the export gate complex. The greater  $\Delta\psi$  did not  
6 increase the FlgD secretion by the  $\Delta flgM$  mutant in a way similar to wild-type cells (Fig.  
7 3d). Because  $\Delta\psi$  is essential for flagellar protein export by wild-type cells<sup>13,14</sup>, we  
8 suggest that the cytoplasmic ATPase complex consisting of FliH and FliI facilitates  
9 efficient and rapid docking of export substrates to the FlhA<sub>C</sub>-FlhB<sub>C</sub> docking platform in  
10 a  $\Delta\psi$ -dependent manner.

11  
12 **Effect of greater SMF on flagellar protein export.** Flagellar protein export by the  
13  $\Delta fliH-fliI flhB(P28T)$  mutant shows a clear dependence on external Na<sup>+</sup> concentration  
14 at external pH 7.5<sup>17</sup>. Therefore, we tested whether greater SMF increases the secretion  
15 level of FlgD by this mutant. Total SMF across the cell membrane was about 45 mV  
16 greater at external pH 8.5 than at external pH 7.5 (Fig. 5a and Supplementary Table  
17 1). The  $\Delta fliH-fliI flhB(P28T)$  cells were grown in TB-7.5 at 30°C for 3 hours. After  
18 washing twice with TB-7.5, the cells were resuspended in fresh TB-7.5 or TB-8.5 with  
19 or without 100 mM NaCl, and incubation was continued at 30°C for 1 hour. In  
20 agreement with a previous report<sup>17</sup>, addition of 100 mM NaCl increased the secretion  
21 level of FlgD by the  $\Delta fliH-fliI flhB(P28T)$  mutant from almost zero to more than 100-fold  
22 at external pH 7.5, and this FlgD secretion level was about 3-fold higher compared to  
23 that at external pH 8.5 in the absence of Na<sup>+</sup> (Fig. 5b). Greater SFM by an upward shift  
24 of external pH from 7.5 to 8.5 increased the secretion level of FlgD by about 2-fold in  
25 the presence of Na<sup>+</sup> (Fig. 5b). These results demonstrate that the translocation rate of

1 flagellar building blocks depends on the rate of the Na<sup>+</sup> flow through the FlhA channel  
2 of the export gate complex.

3 We next analyzed the number and length of the flagellar filaments produced by  
4 the  $\Delta fliH$ -*fliI* *flhB*(P28T) strain in the presence of 100 mM NaCl (Fig. 4a and  
5 Supplementary Table 2). About 73.5% of the  $\Delta fliH$ -*fliI* *flhB*(P28T) cells produced  
6 flagellar filaments with an average of  $1.4 \pm 0.6$  per cell (mean  $\pm$  SD,  $n = 125$ ) at external  
7 pH 7.5 (Fig. 4b, c). The average filament length was  $7.6 \pm 2.5$   $\mu\text{m}$  ( $n = 50$ ), which was  
8 about 64% of the wild-type length [ $11.9 \pm 2.6$   $\mu\text{m}$  ( $n = 50$ )] (Fig. 4c). In contrast, about  
9 96.3% of the  $\Delta fliH$ -*fliI* *flhB*(P28T) cells produced the filaments with an average of  $1.8 \pm$   
10  $0.8$  per cell ( $n = 180$ ) at external pH 8.5 (Fig. 4b). The average filament length was  $9.0$   
11  $\pm 2.6$   $\mu\text{m}$  ( $n = 50$ ), which was about 86.5% of the wild-type length [ $10.4 \pm 2.7$   $\mu\text{m}$  ( $n =$   
12  $50$ )] (Fig. 4c). Because SMF was larger than PMF under our experimental conditions  
13 (Figs 2b and 5a and Supplementary Table 1), we propose that the increase in  $\Delta\psi$  acts  
14 on the FlhA channel to further facilitate the inward-directed ion translocation coupled  
15 with the outward-directed protein translocation.

16 We tested whether the *flhA*(F459A) mutation affects Na<sup>+</sup>-coupled flagellar  
17 protein export. The greater SFM did not significantly affect the secretion level of FlgD  
18 by the  $\Delta fliH$ -*fliI* *flhB*(P28T) *flhA*(F459A) mutant (Fig. 5b). We also obtained essentially  
19 the same results with alternative  $\Delta fliH$ -*fliI* *flhB*(P28T) *flhA*(D456V) and  $\Delta fliH$ -*fliI*  
20 *flhB*(P28T) *flhA*(T490M) mutants (Supplementary Fig. 1b). These results raise the  
21 possibility that these FlhA mutations do not increase the  $\Delta\psi$ -dependent Na<sup>+</sup> channel  
22 activity of FlhA. To clarify this, we measured intracellular Na<sup>+</sup> concentration change of  
23 FlhA-expressing *E. coli* cells using a fluorescent Na<sup>+</sup> indicator dye, CoroNa Green  
24 (Supplementary Fig. 3b and Supplementary Table 4). Overexpression of FlhA caused  
25 a significant increment in the intracellular Na<sup>+</sup> concentration in the presence of 100 mM

1 NaCl but not in its absence, in agreement with a previous report<sup>17</sup>. The intracellular  
2 Na<sup>+</sup> concentration of the FlhA-expressing cells increased from  $4.5 \pm 2.1$  mM (average  
3  $\pm$  standard error,  $n = 30$ ) to  $73.1 \pm 10.8$  mM ( $n = 30$ ) (Supplementary Fig. 3b). The  
4 intracellular Na<sup>+</sup> concentration of cells over-expressing FlhA with the D456V, F469A or  
5 T490M mutation reached  $84.1 \pm 16.7$  mM ( $n = 30$ ),  $94.2 \pm 17.7$  mM ( $n = 30$ ) or  $75.6 \pm$   
6  $13.7$  mM ( $n = 30$ ), respectively (Supplementary Fig. 3b), indicating that these *flhA*  
7 mutations do not significantly affect the Na<sup>+</sup> channel activity of FlhA. Therefore, we  
8 propose that the inward-directed Na<sup>+</sup> translocation rate depends not only on SMF  
9 across the cell membrane but also on the rate of the outward-directed protein  
10 translocation through the polypeptide channel of the transmembrane export gate  
11 complex.

12 We finally investigated whether the greater SMF affects the secretion of FlgD  
13 by the  $\Delta fliH$ -*fliI* *flhB*(P28T)  $\Delta flgM$  mutant. At external pH 7.5, the secretion level of FlgD  
14 was considerably increased by adding 100 mM NaCl (Fig. 5b), indicating that Na<sup>+</sup>  
15 facilitates flagellar protein export. Increasing external pH from 7.5 to 8.5 increased the  
16 secretion level of FlgD by about 1.5-fold in the presence of 100 mM NaCl (Fig. 5b).  
17 Because the 1.5-fold greater  $\Delta\psi$  increased the secretion level of FlgD also in the  
18 absence of NaCl (Fig. 5b), we suggest that the FlgM deletion increases the docking  
19 efficiency of export substrate to the export gate complex in the absence of FliH and FliI  
20 and that the  $\Delta pNa$  component determines the rate of the inward-directed Na<sup>+</sup> flow  
21 coupled with the outward-directed protein translocation through the polypeptide  
22 channel. Neither greater  $\Delta\psi$  nor SMF increased the FlgD secretion by the  $\Delta flgM$  mutant  
23 in a way similar to wild-type cells (Fig. 5b). Therefore, we suggest that the cytoplasmic  
24 ATPase complex facilitates not only export substrate docking to the export gate  
25 complex but also facilitates the H<sup>+</sup> flow through the FlhA channel.

1

## 2 **Discussion**

3 The transmembrane export gate complex is a dual fuel engine that utilizes both H<sup>+</sup> and  
4 Na<sup>+</sup> to drive flagellar protein export. FlhA can conduct H<sup>+</sup> and Na<sup>+</sup> along IMF across  
5 the cell membrane<sup>17</sup>. In the wild-type protein export apparatus,  $\Delta\text{pI}$  ( $\Delta\text{pH}$  or  $\Delta\text{pNa}$ )  
6 component of IMF is not essential, and only the  $\Delta\psi$  component is sufficient for flagellar  
7 protein export<sup>13</sup>. But since the  $\Delta\text{pH}$  and  $\Delta\text{pNa}$  components become essential in the  
8 absence of the cytoplasmic ATPase complex<sup>14,17</sup>,  $\Delta\text{pH}$  and  $\Delta\text{pNa}$  are thought to be  
9 required for efficient transit of H<sup>+</sup> and Na<sup>+</sup> across the cell membrane, respectively.  
10 However, the role of  $\Delta\psi$  remained a mystery.

11 In this study, we used the *Salmonella*  $\Delta\text{fliH-fliI flhB}(P28T)$  mutant to see the  
12 impact of an increment in the  $\Delta\psi$  component on flagellar protein export in the absence  
13 of  $\Delta\text{pH}$  and  $\Delta\text{pNa}$ , under which condition the flagellar protein export machinery of this  
14 mutant is inactive. An upward pH shift from 7.5 to 8.5 increased  $\Delta\psi$  by 1.5-fold to  
15 maintain total PMF (Fig. 2). When  $\Delta\psi$  rose above a certain threshold, the  
16 transmembrane export gate complex of the  $\Delta\text{fliH-fliI flhB}(P28T)$  mutant became an  
17 active protein transporter to drive H<sup>+</sup>-coupled protein export to form a few flagella in  
18 the absence of positive  $\Delta\text{pH}$  and  $\Delta\text{pNa}$  (Figs. 3b and 4). This suggests that the export  
19 gate complex is a voltage-gated protein transporter to open its polypeptide and ion  
20 channels in a  $\Delta\psi$ -dependent manner. The *flhA(F459A)* mutation in FlhA<sub>C</sub>, which  
21 increases the probability of the substrate entry into a polypeptide channel of the export  
22 gate complex in the absence of FliH and FliI<sup>21</sup>, allowed the export gate complex of the  
23  $\Delta\text{fliH-fliI flhB}(P28T)$  mutant to transport FlgD to the cell exterior to a considerable  
24 degree in the absence of  $\Delta\text{pH}$  and  $\Delta\text{pNa}$  (Fig. 2c and Supplementary Fig. 1).

1 Furthermore, a large increase in the expression levels of export substrates by FlgM  
2 depletion also increased the secretion level of FlgD by the  $\Delta fliH$ -*fliI* *flhB*(P28T) mutant  
3 in the absence of  $\Delta$ pH and  $\Delta$ pNa (Fig. 2c). These results suggest that the efficient  
4 docking of export substrates to the FlhA<sub>C</sub>-FlhB<sub>C</sub> docking platform autonomously  
5 induces the gate opening of the polypeptide channel, thereby facilitating the outward-  
6 directed protein translocation through the polypeptide channel coupled with the inward-  
7 directed H<sup>+</sup> translocation through the FlhA channel, but there is also a  $\Delta\psi$ -dependent  
8 activation mechanism of protein export that independently works to compensate other  
9 mechanisms to maintain the protein export activity under some conditions. Therefore,  
10 we propose that  $\Delta\psi$  acts not only on the polypeptide channel to drive the translocation  
11 of export substrates across the cytoplasmic membrane but also on the FlhA ion  
12 channel to facilitate the H<sup>+</sup> flow coupled with flagellar protein export.

13 Neither H<sup>+</sup> nor Na<sup>+</sup> channel activity of FlhA was affected by the *flhA*(F459A)  
14 mutation (Supplementary Fig. 3). However, the  $\Delta$ pNa component of SMF increased  
15 the secretion level of FlgD by the  $\Delta fliH$ -*fliI* *flhB*(P28T) *flhA*(F459A) mutant at both  
16 external pH 7.5 and 8.5 (Fig. 5b and Supplementary Fig. 1), suggesting that  $\Delta$ pNa  
17 facilitates the Na<sup>+</sup> translocation through the FlhA channel coupled with the protein  
18 translocation through the polypeptide channel. In the presence of FliH and FliI, the  
19 greater  $\Delta\psi$  above the threshold affected the secretion level of FlgD neither by the  
20 *flhA*(F459A) gain-of-function mutation nor the FlgM deletion (Figs 3 and 5b). Therefore,  
21 we suggest that the function of the cytoplasmic ATPase complex is sufficient to make  
22 the export gate complex fully functional by facilitating the docking of export substrates  
23 to the FlhA<sub>C</sub>-FlhB<sub>C</sub> docking platform and subsequent substrate entry into a polypeptide  
24 channel and that the free energy derived from ATP hydrolysis by the FliI ATPase is  
25 required for rapid and efficient  $\Delta\psi$ -dependent H<sup>+</sup> translocation through the FlhA

1 channel, which is tightly coupled with the translocation of export substrates into a  
2 polypeptide channel as proposed previously<sup>12,15,16,21</sup>.

3         Why does the flagellar export engine maintain the  $\Delta\psi$ -dependent activation  
4 mechanism throughout the evolutionary process? When planktonic motile cells attach  
5 to a solid surface, 3'-5' cyclic diguanylate monophosphate (cyclic-di-GMP), a  
6 nucleotide second messenger, inhibits flagella-driven motility to trigger a motility-to-  
7 biofilm transition. The flagellar regulon is placed under control of cyclic-di-GMP  
8 signalling networks so that flagellar gene transcription is suppressed during biofilm  
9 development<sup>30,31</sup>. It has been reported that cyclic di-GMP directly binds to the ATP-  
10 binding pocket of the FliI ATPase to inhibit the ATPase activity, suggesting that the FliI  
11 ATPase is not functional in cells living in the biofilm<sup>32</sup>. Furthermore,  $\Delta\psi$  is quite small  
12 in the biofilm structure<sup>20</sup>. On the other hand, flagella-driven motility of a subpopulation  
13 of planktonic cells in the biofilm structure is essential to keep the cells in the biofilm  
14 alive and healthy<sup>33</sup>, raising a question of how the flagellar export engine is activated to  
15 generate flagellated cells during biofilm development. It has been shown that a  
16 metabolic trigger induces release of intracellular potassium ( $K^+$ ) through a  $K^+$  channel,  
17 which in turn depolarizes neighbouring cells in the biofilm, thereby allowing the cells to  
18 uptake nutrients in a  $\Delta\psi$ -dependent manner<sup>20</sup>. Because the FliI ATPase adopts an  
19 inactive form and available flagellar building blocks are limited in the cytoplasm of the  
20 cells in the biofilm, we propose that the voltage-gated mechanism of the flagellar export  
21 engine is essential for survival of the cells by efficiently generating flagellated cells in  
22 the biofilm structure.

23

## 24 **Methods**

1 **Bacterial strains, plasmids and Media.** *Salmonella* strains and plasmids used in  
2 this study are listed in Supplementary Table 4. T-broth (TB) contained 1% Bacto  
3 tryptone, 10 mM potassium phosphate, pH 7.5 (TB-7.5) or pH 8.5 (TB-8.5).

4  
5 **Secretion assay.** *Salmonella* cells were grown overnight in TB-7.5 without 100 mM  
6 NaCl. A 50  $\mu$ l of the overnight culture was inoculated into a 5 ml of fresh TB-7.5 or  
7 TB-8.5 with or without 100 mM NaCl and incubated at 30 °C with shaking until the  
8 cell density had reached an OD<sub>600</sub> of ca. 1.4–1.6. To test the effect of a chemical  
9 gradient of Na<sup>+</sup> on flagellar protein export, the cells were grown in 5 ml of TB-7.5  
10 containing 100 mM NaCl with shaking at 30 °C until the cell density had reached an  
11 OD<sub>600</sub> of ca. 1.0–1.2. After washing the cells twice, the cells were resuspended in 5  
12 ml TB-7.5 or TB-8.5 with or without 100 mM NaCl, followed by incubation at 30 °C for  
13 1 hour with shaking. Cultures were centrifuged to obtain cell pellets and culture  
14 supernatants. Cell pellets were resuspended in an SDS-loading buffer (62.5 mM Tris-  
15 HCl, pH 6.8, 2% SDS, 10% glycerol, 0.001% bromophenol blue) containing 1  $\mu$ l of 2-  
16 mercaptoethanol, normalized to a cell density to give a constant number of cells.  
17 Proteins in the culture supernatants were precipitated by 10% trichloroacetic acid,  
18 suspended in a Tris/SDS loading buffer (one volume of 1 M Tris, nine volumes of 1 X  
19 SDS loading buffer) containing 1  $\mu$ l of 2-mercaptoethanol and heated at 95°C for 3  
20 min. After Sodium Dodecyl Sulfate–polyacrylamide gel electrophoresis (SDS–PAGE),  
21 immunoblotting with polyclonal anti-FlgD antibody was carried out as described  
22 previously<sup>34</sup>. Detection was performed with an ECL plus immunoblotting detection kit  
23 (GE Healthcare).

24



1 **Observation of flagellar filaments with a fluorescent dye.** The flagellar filaments  
2 produced by *Salmonella* cells were labelled using anti-FliC antiserum and anti-rabbit  
3 IgG conjugated with Alexa Fluor® 594 (Invitrogen) as described previously<sup>16</sup>. The  
4 cells were observed by fluorescence microscopy as described previously<sup>35</sup>.  
5 Fluorescence images were analysed using ImageJ software version 1.52 (National  
6 Institutes of Health).

7

8 **Measurements of  $\Delta\psi$ , intracellular pH and intracellular sodium ion**  
9 **concentration.** The  $\Delta\psi$  component was measured using tetramethylrhodamine  
10 methyl ester (Invitrogen) as described previously<sup>14</sup>. Intracellular pH measurements  
11 with a ratiometric fluorescent pH indicator protein, pHluorin(M153R), were carried out  
12 as described before<sup>24</sup>. Intracellular sodium ion concentration was measured using  
13 CoroNa Green (Invitrogen) as described previously<sup>17,36</sup>.

14

15 **Statistical analysis.** Statistical analyses were done using Prism 7.0c software  
16 (GraphPad). Comparisons were performed using a two-tailed Student's *t*-test. A *P*  
17 value of < 0.05 was considered to be statistically significant difference.

18

## 19 **References**

- 20 1. Nicholls D.G. & Ferguson S.J. Bioenergetics 3. Academic Press, London (2002).
- 21 2. Delgado-Partin, V. M. & Dalbey, R. E. The proton motive force, acting on acidic  
22 residues, promotes translocation of amino-terminal domains of membrane  
23 proteins when the hydrophobicity of the translocation signal is low. *J. Biol. Chem.*  
24 **273**, 9927-9934 (1998).

- 1 3. Cao, G., Kuhn, A. & Dalbey, R. E. The translocation of negatively charged  
2 residues across the membrane is driven by the electrochemical potential:  
3 evidence for an electrophoresis-like membrane transfer mechanism. *EMBO J.* **14**,  
4 866-875 (2004).
- 5 4. Morimoto, Y.V. & Minamino, T. Structure and function of the bi-directional bacterial  
6 flagellar motor. *Biomolecules* **4**, 217–234 (2014).
- 7 5. Nakamura, S. & Minamino, T. Flagella-driven motility of bacteria. *Biomolecules.* **9**,  
8 279 (2019).
- 9 6. Lo, C. J., Leake, M. C., Pilizota, T. & Beryy, R. M. Nonequivalence of membrane  
10 voltage and ion-gradient as driving forces for the bacterial flagellar motor at low  
11 load. *Biophys. J.* **93**, 294-302 (2007).
- 12 7. Minamino, T., Imada, K. & Namba, K. Mechanisms of type III protein export for  
13 bacterial flagellar assembly. *Mol. BioSyst.* **4**, 1105–1115 (2008).
- 14 8. Minamino, T. Protein export through the bacterial flagellar type III export pathway.  
15 *Biochim. Biophys. Acta.* **1843**, 1642–1648 (2014)..
- 16 9. Galán, J.E., Lara-Tejero, M., Marlovits, T.C. & Wagner, S. Bacterial type III  
17 secretion systems: specialized nanomachines for protein delivery into target cells.  
18 *Annu. Rev. Microbiol.* **68**, 415–438 (2014).
- 19 10. Ibuki, T. *et al.* Common architecture between the flagellar protein export apparatus  
20 and F- and V-ATPases. *Nat. Struct. Mol. Biol.* **18**, 277–282 (2011).
- 21 11. Imada, K., Minamino, T., Uchida, Y., Kinoshita, M. & Namba, K. Insight into the  
22 flagella type III export revealed by the complex structure of the type III ATPase  
23 and its regulator. *Proc. Natl. Acad. Sci. USA* **113**, 3633–3638 (2016).
- 24 12. Minamino, T. & Namba, K. Distinct roles of the FliI ATPase and proton motive force  
25 in bacterial flagellar protein export. *Nature* **451**, 485–488 (2008).

- 1 13. Paul, K., Erhardt, M., Hirano, T., Blair, D.F. & Hughes, K.T. Energy source of  
2 flagellar type III secretion. *Nature* **451**, 489–492 (2008).
- 3 14. Minamino, T., Morimoto, Y.V., Hara, N. & Namba, K. An energy transduction  
4 mechanism used in bacterial type III protein export. *Nat. Commun.* **2**, 475 (2011).
- 5 15. Morimoto, Y.V. *et al.* High-resolution pH imaging of living bacterial cell to detect  
6 local pH differences. *mBio* **7**, 01911-16 (2016).
- 7 16. Minamino, T., Morimoto, Y.V., Kinoshita, M., Aldridge, P.D. & Namba, K. The  
8 bacterial flagellar protein export apparatus processively transports flagellar  
9 proteins even with extremely infrequent ATP hydrolysis. *Sci. Rep.* **4**, 7579 (2014).
- 10 17. Minamino, T., Morimoto, Y.V., Hara, N., Aldridge, P.D. & Namba, K. The bacterial  
11 flagellar type III export gate complex is a dual fuel engine that can use both H<sup>+</sup>  
12 and Na<sup>+</sup> for flagellar protein export. *PLOS Pathog.* **12**, e1005495 (2016).
- 13 18. Nakamura, S., *et al.* Effect of intracellular pH on the torque-speed relationship of  
14 bacterial proton-driven flagellar motor. *J. Mol. Biol.* **386**, 332-338 (2009).
- 15 19. Krulwich, T.A., Sachs, G. & Padan, E. Molecular aspects of bacterial pH sensing  
16 and homeostasis. *Nature Rev. Microbiol.* **9**, 330–343 (2011).
- 17 20. Prindle, A. *et al.* Ion channels enable electrical communication in bacterial  
18 communities. *Nature* **572**, 59–63 (2015).
- 19 21. Inoue, Y., Morimoto, Y. V., Namba, K. & Minamino, T. Novel insights into the  
20 mechanism of well-ordered assembly of bacterial flagellar proteins in *Salmonella*.  
21 *Sci. Rep.* **8**, 1787 (2018).
- 22 22. Kinoshita, M., Hara, N., Imada, K., Namba, K. & Minamino, T. Interactions of  
23 bacterial chaperone-substrate complexes with FlhA contribute to co-ordinating  
24 assembly of the flagellar filament. *Mol. Microbiol.* **90**, 1249–1261 (2013).
- 25 23. Miesenböck, G., Angelis, D.A. & Rothman, J.E. Visualization secretion and

- 1 synaptic transmission with pH-sensitive green fluorescent proteins. *Nature* **394**,
- 2 192–195 (1998).
- 3 24. Morimoto, Y.V., Kojima, S., Namba, K. & Minamino, T. M153R mutation in a pH-
- 4 sensitive green fluorescent protein stabilizes its fusion proteins. *PLoS One* **6**,
- 5 e19598 (2011).
- 6 25. Minamino, T. & Macnab, R. M. Interactions among components of the *Salmonella*
- 7 flagellar export apparatus and its substrates. *Mol. Microbiol.* **35**, 1052–1064
- 8 (2000).
- 9 26. Minamino, T. Hierarchical protein export mechanism of the bacterial flagellar type
- 10 III protein export apparatus. *FEMS Microbiol. Lett.* **365**, fny117 (2018).
- 11 27. Gillen, K.L. & K.T. Hughes. Molecular characterization of *flgM*, a gene encoding a
- 12 negative regulator of flagellin synthesis in *Salmonella typhimurium*. *J. Bacteriol.*
- 13 **173**, 6453–6459 (1991).
- 14 28. Erhardt, M., Mertens, M.E., Fabiani, F.D. & Hughes, K.T. ATPase-independent
- 15 type-III protein secretion in *Salmonella enterica*. *PLoS Genet.* **10**, e1004800
- 16 (2014).
- 17 29. Minamino, T. *et al.* FliH and FliI ensure efficient energy coupling of flagellar type
- 18 III protein export in *Salmonella*. *MicrobiologyOpen* **5**, 424–435 (2016).
- 19 30. Romling, U., Galperin, M. Y. & Gomelsky, M. Cyclic di-GMP: the first 25 years of a
- 20 universal bacterial second messenger. *Microbiol. Mol. Biol. Rev.* **77**, 1–52 (2013).
- 21 31. Guttenplan, S. B. & Kearns, D. B. Regulation of flagellar motility during biofilm
- 22 formation. *FEMS Microbiol. Rev.* **37**, 849–871 (2013).
- 23 32. Trampari, *et al.* Bacterial rotary export ATPases are allosterically regulated by the
- 24 nucleotide second messenger cyclic-di-GMP. *J. Biol. Chem.* **290**, 24470–24483
- 25 (2015).

- 1 33. Houry, A. et al. Bacterial swimmers that infiltrate and take over the biofilm matrix.  
2 *Proc. Natl. Acad. Sci. USA.* **109**, 13088–13093 (2012).
- 3 34. Minamino, T. & Macnab, R.M. Components of the *Salmonella* flagellar export  
4 apparatus and classification of export substrates. *J. Bacteriol.* **181**, 1388–1394  
5 (1999).
- 6 35. Morimoto, Y.V., Nakamura, S., Kami-ike, N., Namba, K. & Minamino, T. Charged  
7 residues in the cytoplasmic loop of MotA are required for stator assembly into the  
8 bacterial flagellar motor. *Mol. Microbiol.* **78**, 1117–1129 (2010).
- 9 36. Morimoto, Y.V., Namba, K. & Minamino, T. Bacterial intracellular sodium ion  
10 measurement using CoroNa green. *bio-protocol* **7**, e2092 (2017).

11

## 12 **Acknowledgements**

13 We acknowledge Yasuyo Abe for technical assistance. This work was supported in  
14 part by JSPS KAKENHI Grant Numbers JP26293097 and JP19H03182 (to T.M.),  
15 JP15H05593 and JP18K06159 (to Y.V.M), JP18K14638 and JP20K15749 (to M.K.)  
16 and JP25000013 (to K.N.) and MEXT KAKENHI Grant Numbers JP15H01640 (to T.M.)  
17 and JP26115720 and JP15H01335 (to Y.V.M). This work has also been partially  
18 supported by JEOL YOKOGUSHI Research Alliance Laboratories of Osaka University  
19 to K.N.

20

## 21 **Author Contributions**

22 T.M. and K.N. conceived and designed research; T.M., Y.V.M. and M.K. performed  
23 experiments; T.M., Y.V.M. and M.K. analysed the data, and T.M. and K.N. wrote the  
24 paper based on discussion with other authors.

25

1 **ORCID for corresponding author**

2 T. Minamino: <https://orcid.org/0000-0002-8175-1951>

3 K. Namba: <https://orcid.org/0000-0003-2911-5875>

4

5 **Competing interests**

6 The authors declare no competing interests.

7

8 **Materials & Correspondence**

9 Correspondence and requests for materials should be addressed to T.M.

10 (tohru@fbs.osaka-u.ac.jp) and K.N. (keiichi@fbs.osaka-u.ac.jp).

11

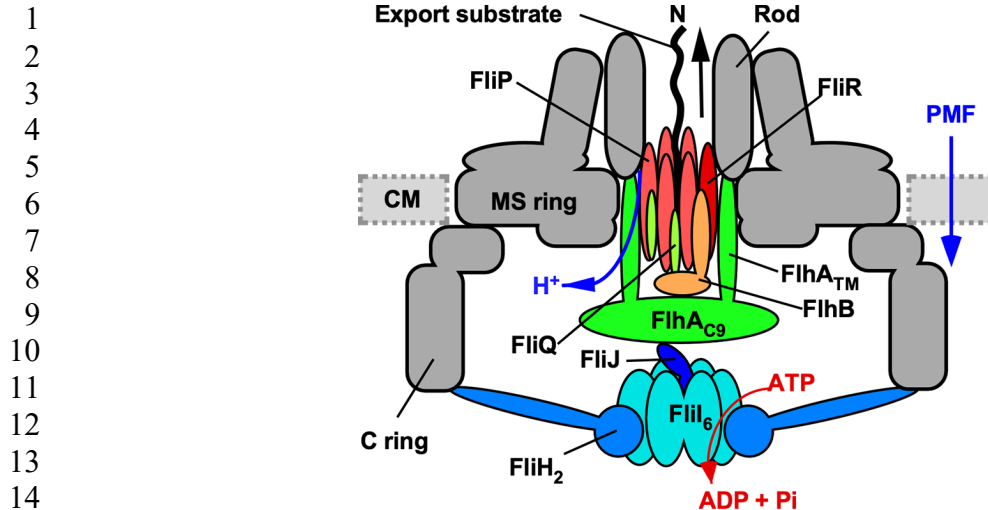

**Fig. 1. Cartoon of the flagellar protein export machinery.** The flagellar protein export machinery is composed of a transmembrane export gate complex made of FliA, FliB, FliP, FliQ and FliR and a cytoplasmic ATPase ring complex consisting of FliH, FliI and FliJ. The export gate complex is located inside the MS ring and utilizes proton motive force (PMF) across the cytoplasmic membrane (CM) to drive proton ( $H^+$ )-coupled flagellar protein export. FliP, FliQ and FliR form a polypeptide channel complex. FliB associates with the FliP/FliQ/FliR complex, and its C-terminal cytoplasmic domain (FliB<sub>C</sub>) projects into the central cavity of the C ring. FliA forms a homo-nonamer through interactions between the C-terminal cytoplasmic domain of FliA (FliA<sub>C</sub>), and its N-terminal transmembrane domain (FliA<sub>TM</sub>) forms a pathway for the transit of  $H^+$  from the periplasm to the cytoplasm. The cytoplasmic ATPase ring complex associates with the C ring through an interaction between FliH and a C ring protein, FliI. ATP hydrolysis by the FliI ATPase activates the export gate complex through an interaction between FliJ and FliA<sub>C</sub>, allowing the gate complex to become an active export engine to couple the proton flow through the FliA proton channel to the translocation of export substrates into the polypeptide channel. When the cytoplasmic ATPase complex is missing, the export gate complex also utilizes  $Na^+$  as the coupling ion to drive flagellar protein export.

33

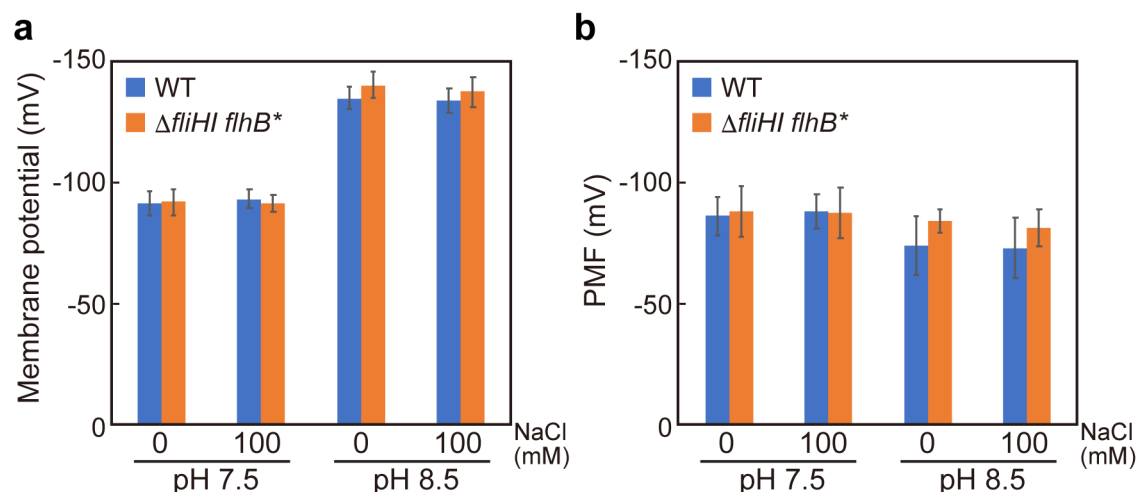

1  
2 **Fig. 2. Effect of external pH on  $\Delta\psi$ .** (a) Measurements of  $\Delta\psi$ . *Salmonella* SJW1103  
3 (WT) and MMHI0117 ( $\Delta fliHI flhB^*$ ) cells were exponentially grown at 30°C in TB-7.5  
4 or TB-8.5 with or without 100 mM NaCl. The membrane potential difference (mV) was  
5 measured by using tetramethylrhodamine methyl ester. Vertical bars indicate  
6 standard deviations. (b) Measurements of total proton motive force (PMF).  
7 Intracellular pH was measured using pHluorin(M153R). Four independent  
8 measurements were carried out. Vertical bars indicate standard deviations. (See  
9 Supplementary Table 1)

10



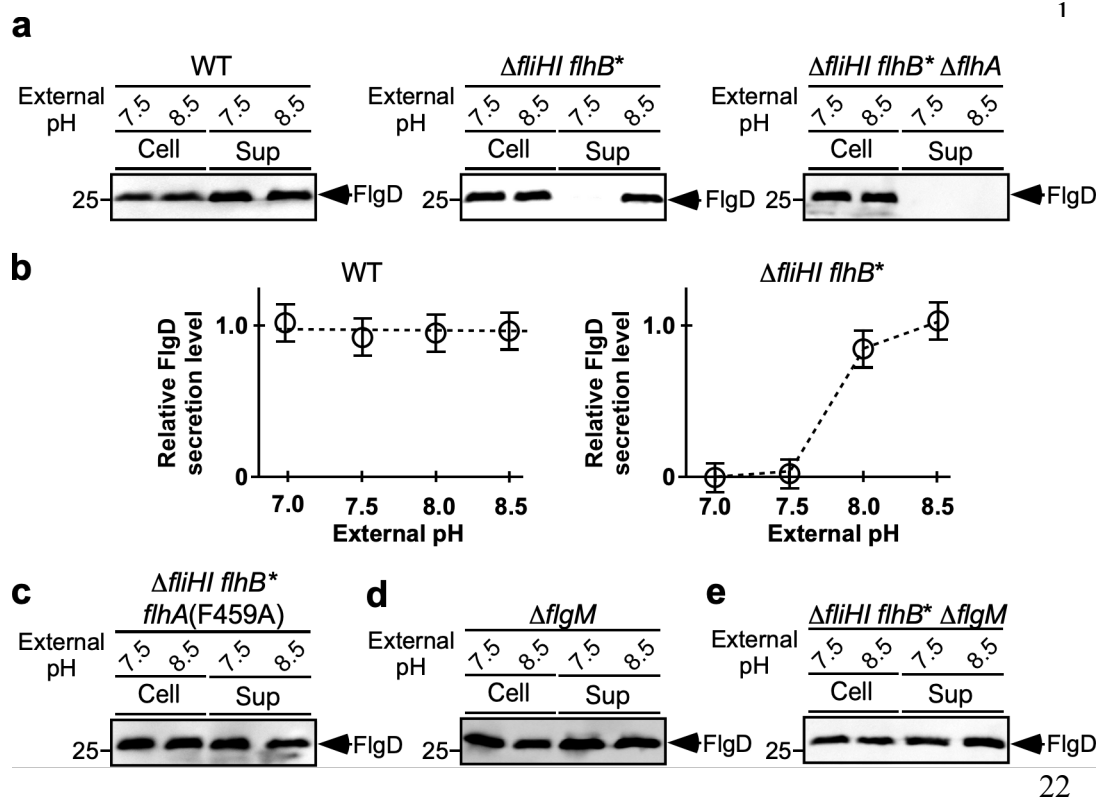

23 **Fig. 3. Effect of increase in  $\Delta\psi$  on flagellar protein export. (a)** Effect of external pH  
 24 on flagellar protein export by the export gate complex in the presence and absence of  
 25 FliH and FliI. Immunoblotting, using polyclonal anti-FlgD antibody, of whole cell  
 26 proteins (Cell) and culture supernatant fractions (Sup) prepared from SJW1103,  
 27 MMHI0117 and NH004 ( $\Delta fliHI flhB^* \Delta flhA$ ) grown in TB-7.5 or TB-8.5. **(b)** Relative FlgD  
 28 secretion levels. FlgD band densities are normalized for the cellular FlgD levels. These  
 29 data are the average of three independent experiments. **(c, d, f)** Immunoblotting, using  
 30 polyclonal anti-FlgD antibody, of whole cell proteins (Cell) and culture supernatant  
 31 fractions (Sup) prepared from **(c)** MMHI0117-1 [ $\Delta fliHI flhB^* flhA(F459A)$ ], **(d)**  
 32 MM1103gM ( $\Delta flgM$ ) and **(f)** MMHI0117gM ( $\Delta fliHI flhB^* \Delta flgM$ ) grown in TB-7.5 or TB-  
 33 8.5.  
 34

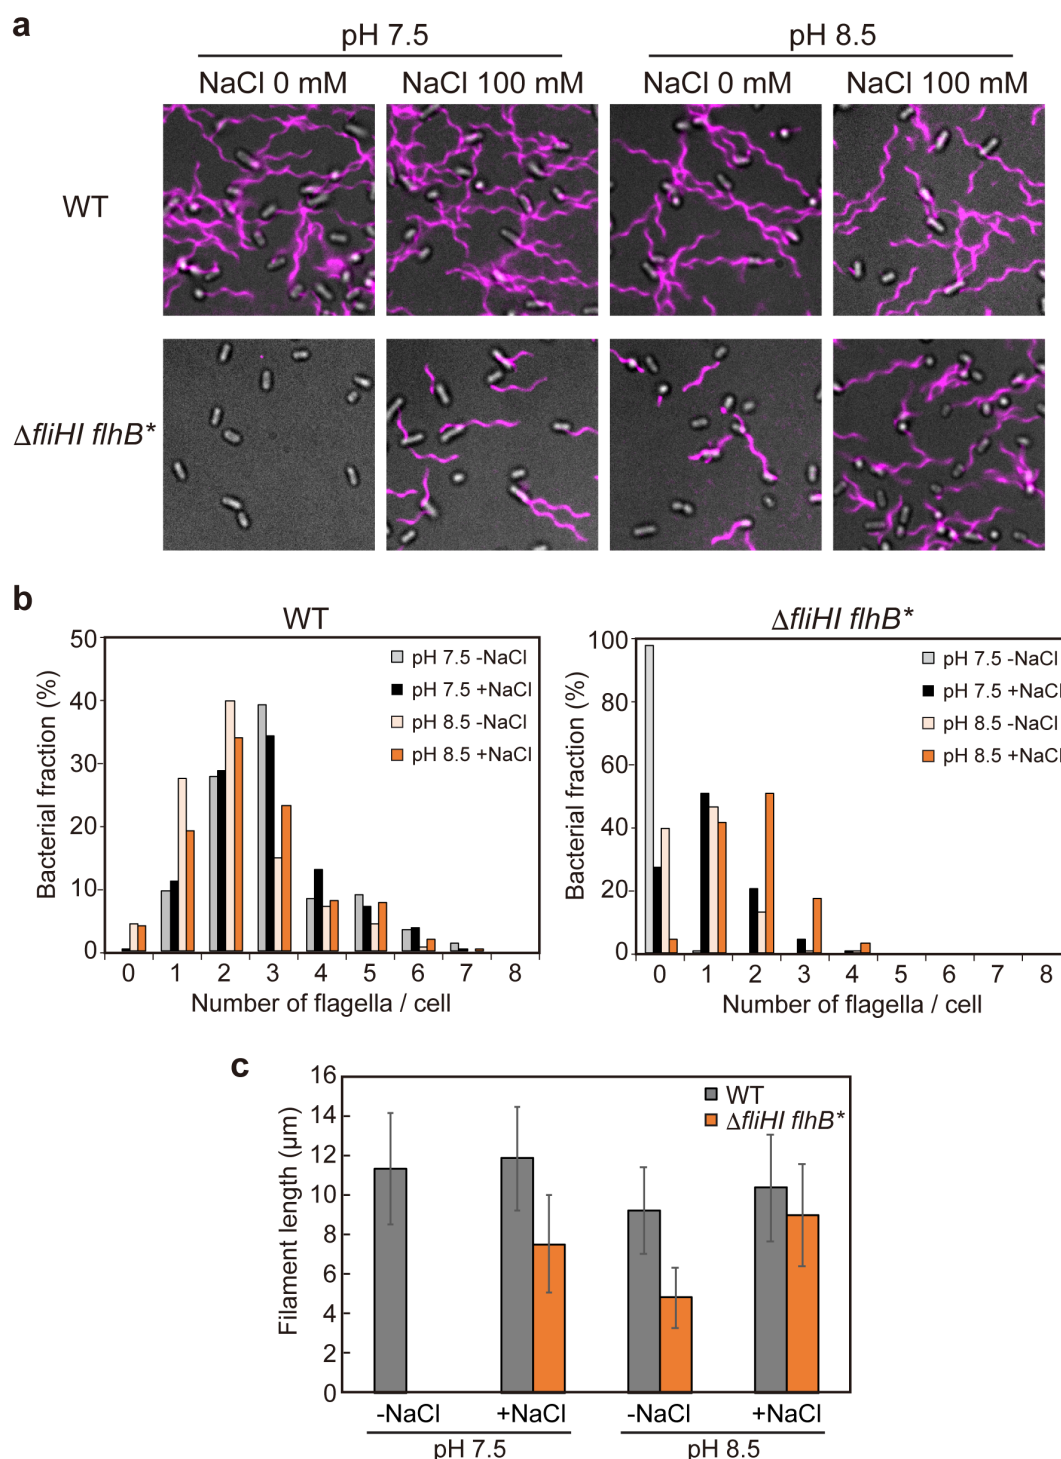

41 **Fig. 4. Effect of the greater  $\Delta\psi$  on flagellar formation.** (a) Fluorescent images of  
 42 SJW1103 (WT) and MMHI0117 ( $\Delta fliHI fliB^*$ ) grown in TB-7.5 or TB-8.5 with or without  
 43 100 mM NaCl. Flagellar filaments were labelled with Alexa Fluor 594. The fluorescence  
 44 images of the filaments labelled with Alexa Fluor 594 (magenta) were merged with the  
 45 bright field images of the cell bodies. (b) Distribution of the number of the flagellar  
 46 filaments in the SJW1103 and MMHI0117 cells. More than 150 cells for each strain  
 47 were counted. (c) Measurements of the length of the flagellar filaments. Filament  
 48 length is the average of 50 filaments, and vertical lines are standard deviations. (See  
 49 Supplementary Table 2)

50

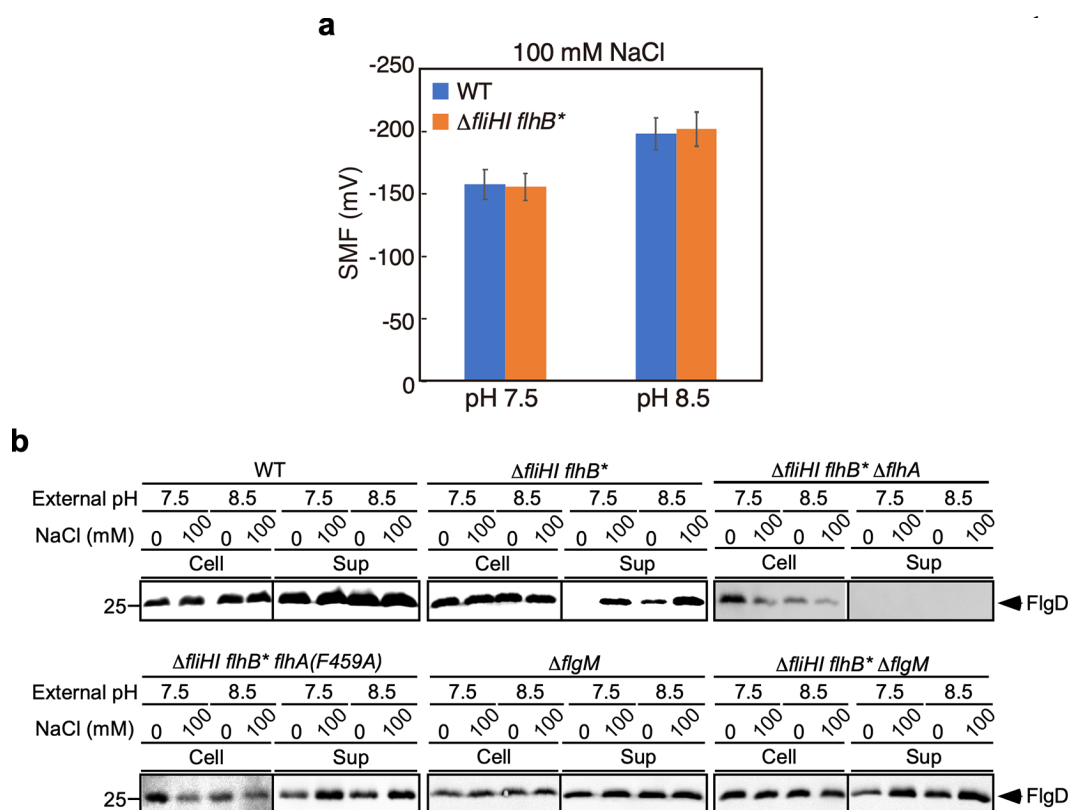

23

24 **Fig. 5. Effect of  $\Delta pNa$  on flagellar protein export. (a)** Measurements of SMF.  
 25 Intracellular  $Na^+$  concentration was measured with CoroNa green. More than 100  
 26 cells were measured. Vertical bars indicate standard deviations. (See Supplementary  
 27 Table 1) **(b)** Effect of  $Na^+$  on flagellar protein export at external pH values of 7.5 and  
 28 8.5. The SJW1103 (WT), MMHI0117 ( $\Delta fliHI flhB^*$ ), NH004 ( $\Delta fliHI flhB^* \Delta flhA$ ),  
 29 MMHI0117-1 [ $\Delta fliHI flhB^* flhA(F459A)$ ], MM1103gM ( $\Delta flgM$ ) and MMHI0117gM ( $\Delta fliHI$   
 30  $flhB^* \Delta flgM$ ) cells were exponentially grown at 30°C in TB-7.5 without 100 mM NaCl.  
 31 After washing twice with TB-7.5 without 100 mM NaCl, the cells were resuspended in  
 32 TB-7.5 or TB-8.5 with or without 100 mM NaCl and incubated at 30°C for 1 hour. The  
 33 whole cell (Cells) and culture supernatant fractions (Sup) were analyzed by  
 34 immunoblotting with polyclonal anti-FlgD antibody.
